# Supplementary material for: The Superiority of Bacillus megaterium over Escherichia coli as a Recombinant Bacterial Host for Hyaluronic Acid Production
Source: MDPI journal article supplement (doi:10.3390/microorganisms10122347), 2022-11-28
Supplement: s1 [file s1]

**Table S1.** Selection of HA producing *E.coli* Colonies.

| Strain                                                          | Plate one                                   | Plate two                                                   | Plate three                                                                |
|-----------------------------------------------------------------|---------------------------------------------|-------------------------------------------------------------|----------------------------------------------------------------------------|
| pMM <i>hasA</i><br>Rosetta2                                     | LB+glucose1%+chl<br>oramphenicol34ug/<br>ml | LB+glucose1%<br>+0.5%Xylose                                 | LB+glucose1%+0.5%Xylose +<br>Ampicillin100ug/ml                            |
| pP <sub>T7</sub> <i>has ABC</i><br><i>LysY/Iq</i>               | LB+glucose1%                                | LB+glucose1%+0.5<br>mM IPTG                                 | LB+glucose1%+1mM IPTG+<br>Ampicillin100ug/ml                               |
| pPT <sub>7</sub> <i>hasABC</i><br>Rosetta2<br>DE3pLysS          | LB+glucose1%+<br>chloramphenicol<br>34ug/ml | LB+glucose1%+0.5<br>mM IPTG +<br>chloramphenicol3<br>4ug/ml | LB+glucose1%+<br>Chloramphenicol 34ug/ml +1mM<br>IPTG+ Ampicillin100ug/ml  |
| pPT <sub>7</sub> <i>hasABC</i><br>Rosetta B-<br>gammiDE3pLysS   | LB+glucose1%+<br>chloramphenicol34<br>ug/ml | LB+glucose1%+0.5<br>mMIPTG +<br>chloramphenicol3<br>4ug/ml  | LB+glucose1% +<br>Chloramphenicol 34ug/ml +1mM<br>IPTG+ Ampicillin100ug/ml |
| pPT <sub>7</sub> <i>hasABCDE</i><br>Rosetta B-<br>gammiDE3pLysS | LB+glucose1%+<br>chloramphenicol34<br>ug/ml | LB+glucose1%+0.5<br>mMIPTG +<br>chloramphenicol3<br>4ug/ml  | LB+glucose1% +<br>Chloramphenicol 34ug/ml +1mM<br>IPTG+ Ampicillin100ug/ml |

**Table S2.** List of oligonucleotides.

| Primers<br>Name                             | Sequence ( <u>Restriction sites</u> )                              | Purpose                              |
|---------------------------------------------|--------------------------------------------------------------------|--------------------------------------|
| Forward <i>hasA</i> pJet                    | ATCGGATCCTGAGGAGACACAACATGAGAACATTA<br>AAAAACCT ( <i>Bam</i> HI).  | Cloning in pJet and pMM1522          |
| Reverse <i>hasA</i> pJet                    | AGAATTGAGGCTCTTATAATTTTTTACGTGT<br>( <i>Sph</i> I).                | Cloning in pJet and pMM1522          |
| Reverse <i>hasAB</i> pJet                   | TTCTGAGAGGCTCTAGTCTCTTCCAAAGAC ( <i>Sph</i> I).                    | Cloning in pJet and pP <sub>T7</sub> |
| Reverse <i>hasABC</i><br>pJet               | TATCGGCATGCTTACTGGGGCTGATC ( <i>Sph</i> I).                        | Cloning in pJet and pP <sub>T7</sub> |
| Forward <i>hasABCDE</i><br>pP <sub>T7</sub> | ATAATCAGATCTGAGGAGACACAACATGAGAACAT<br>TAAAAACCT ( <i>Bg</i> /II). | Cloning in pP <sub>T7</sub>          |
| Reverse <i>hasABC</i><br>pP <sub>T7</sub>   | ATAATCAGATCTTTACTGGGGCTGATC ( <i>Bg</i> /II).                      | Cloning in pP <sub>T7</sub>          |
| Reverse <i>hasABCDE</i><br>pP <sub>T7</sub> | ACTGATCCCGGGTTACAAGCGTGC ( <i>Xma</i> I).                          | Cloning in pP <sub>T7</sub>          |

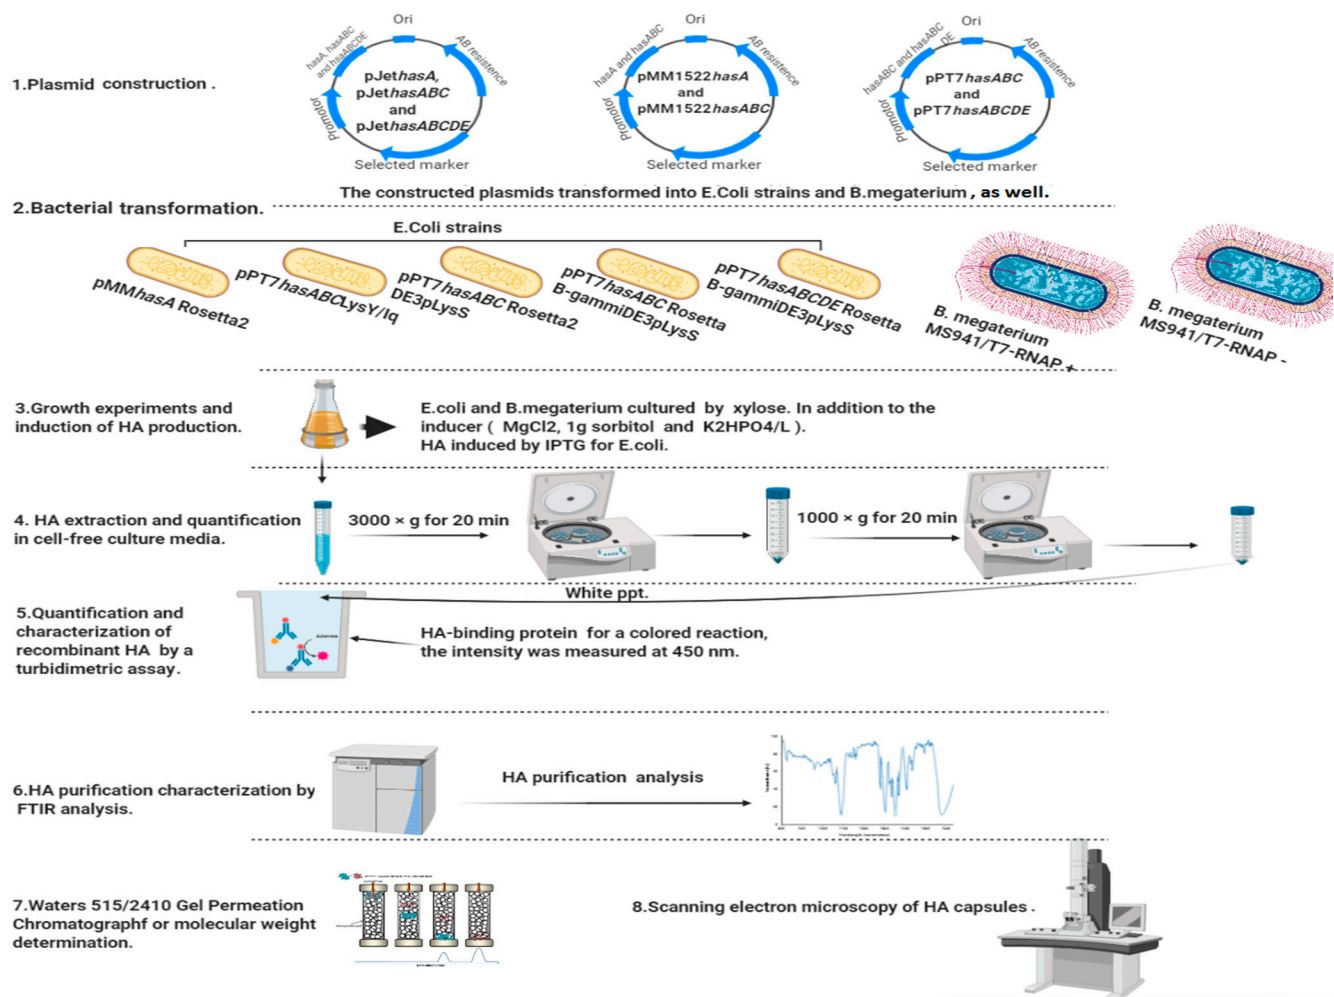

**Figure S1.** The graphical abstract of Materials and Methods.

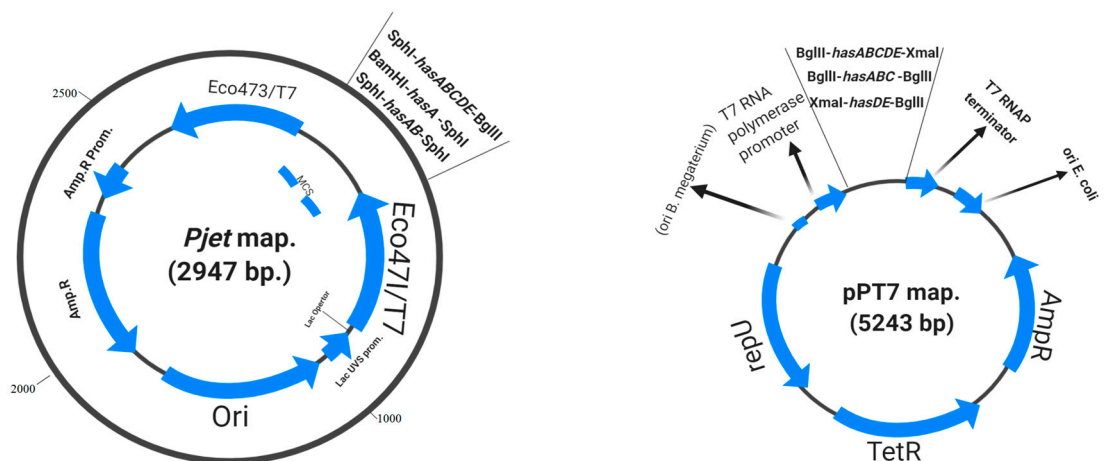

**Figure S2.** Plasmid construction of *hasaABC/DE* cloned into Pjet and pPT7

**Table S3.** Selection of HA producing *Bacillus megaterium* MS941 Colonies

| Strain                                                                                     | Plate One                                       | Plate Two                                                      | Plate Three                                                                           |
|--------------------------------------------------------------------------------------------|-------------------------------------------------|----------------------------------------------------------------|---------------------------------------------------------------------------------------|
| pMM1522 <i>hasA</i> in <i>B. megaterium</i> MS941                                          | LB + glucose 1 %                                | LB + glucose 1 % + 0.5 % Xylose                                | LB + glucose 1 %<br>+ 0.5 % Xylose + tetracycline 4 ug/ml                             |
| pP <sub>T7</sub> <i>has ABC</i> in <i>B. megaterium</i> MS941 pretransformed with T7RNAP.  | LB + glucose 1 % +<br>chloramphenicol 3.4 ug/ml | LB + glucose 1 % +<br>chloramphenicol 3.4 ug/ml + 0.5 % Xylose | LB + glucose 1 % + chloramphenicol 3.4 ug/ml + 0.5 % Xylose +<br>tetracycline 4 ug/ml |
| pP <sub>T7</sub> <i>has ABCDE</i> in <i>B. megaterium</i> MS941 pretransformed with T7RNAP | LB + glucose 1 % +<br>chloramphenicol 3.4 ug/ml | LB + glucose 1 % +<br>chloramphenicol 3.4 ug/ml + 0.5 % Xylose | LB + glucose 1 % +<br>chloramphenicol 3.4 ug/ml + 0.5 % Xylose + tetracycline 4 ug/ml |

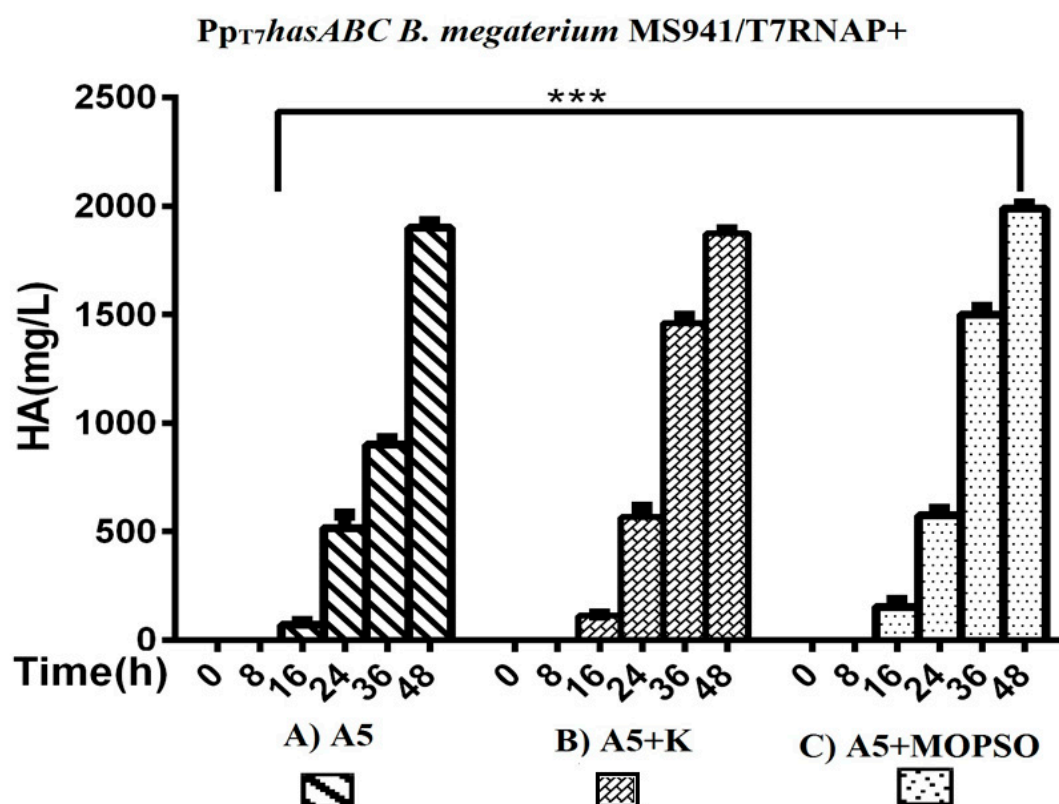

**Figure S3.** HA production by pP<sub>T7</sub>*hasABCDE* *B. megaterium* MS941 pre-transformed with T7RNAP in (A) A5, (B) A5 + K and (C) A5 + MOPSO, (\*\*\*) : P < 0.0001.

**Table S4.** FTIR peaks; reference HA-standard FTIR, and HA produced by pP<sub>T7</sub>hasABCDE *E. coli* Rosetta-gami B pLysS and pP<sub>T7</sub>hasABCDE *B.*

| Wave length<br>(cm <sup>-1</sup> ) | Functional group                            |
|------------------------------------|---------------------------------------------|
| 3600-3604                          | confirms the presence of OH stretching      |
| 2897.89-2936.59                    | C-H stretching                              |
| 1612.79-1653.02                    | Presence of amide II group                  |
| 1410.64-1414.68                    | presence of C-O group with C=O combination, |
| 1042.30-1058.73                    | C-O-C stretching                            |
| 612.32-555.39                      | C-O-C stretching                            |
| 3600-3605                          | confirms the presence of OH stretching      |
| 2897.89-2937.73                    | C-H stretching                              |
| 1612.79-1650.02                    | Presence of amide II group                  |
| 1410.64-1425.93                    | presence of C-O group with C=O combination, |
| 1042.30-1058.49                    | C-O-C stretching                            |
| 612.32-520.39                      | C-O-C stretching                            |
